1 **Title:**

2 **Activation of ACC synthase 2/6 increases stomatal density and cluster on the**  
3 ***Arabidopsis* leaf epidermis during drought**

4 **Running title:**

5 ACS2/6 integrates stomatal developing with spacing

6 Ming-zhu Jia, Ling-yun Liu, Chen Geng, Chun-peng Song\*, Jing Jiang\*

7 State Key Laboratory of Cotton Biology, State Key Laboratory of Crop Stress  
8 Adaptation and Improvement, College of Life Sciences, Henan University,  
9 Kaifeng 475004, Henan Province, China

10 **\*Corresponding author:**

11 **Jing Jiang:** State Key Laboratory of Cotton Biology, State Key Laboratory  
12 of Crop Stress Adaptation and Improvement, College of Life Sciences,  
13 Henan University, Jinming Street, Kaifeng 475004, Henan Province,  
14 China

15 Tel: +86-371-23881387; Fax: +86-371-23881387

16 E-mail: [jiangjing@henu.edu.cn](mailto:jiangjing@henu.edu.cn)

17 **Chun-peng Song:** State Key Laboratory of Crop Stress Adaptation and  
18 Improvement, College of Life Sciences, Henan University, Jinming  
19 Street, Kaifeng 475004, Henan Province, China

20 E-mail: [songcp@henu.edu.cn](mailto:songcp@henu.edu.cn)

21 Date of submission: 27-04-2021

22 Total word count: 5950 words (1032 words in Introduction; 1828 words in  
23 Materials and Methods; 2233 words in Results; 782 words in Discussion; 75  
24 words in Acknowledgements)

25 Number of figures: 9 (8 in color, should be in colour in print and online)

26 Number of tables: 0

27 Supplementary data: 5 figures, 1 tables, 0 videos

28

29 **Highlight**

30 ACC synthase ACS2/6 activation integrated stomatal individual development with

31 space setting between stomata by mediating Ca<sup>2+</sup> levels in stomatal lineage on the

32 leaf epidermis in response to drought.

33

34 **Abstract**

35 It is known that the transcription factor SPEECHLESS (SPCH) drives entry of  
36 epidermal cells into stomatal lineage, and that the activation of subtilisin-like  
37 protease SDD1 reduces stomatal density and cluster on the epidermis. However,  
38 there is still a big gap in our understanding of the relationship between stomatal  
39 development and the establishment of stomatal density and pattern, especially  
40 during drought. Interestingly, 1-aminocyclopropane-1-carboxylic acid (ACC) not  
41 only promotes stomatal development, but also is involved in the establishment of  
42 stomatal density and pattern. ACC generation comes from the activity of ACC  
43 synthase (ACS), while ACS activity could be mediated by drought. This work  
44 showed that the Arabidopsis SPCH activated *ACS2/6* expression and  
45 ACC-dependent stomatal generation with an increase of stomatal density and  
46 cluster under drought conditions; and the possible mechanisms were that  
47 ACC-induced  $\text{Ca}^{2+}$  shortage in stomatal lineage reduced the inhibition of the  
48 transcription factor GT-2 Like 1 (GTL1) on *SDD1* expression. These suggest that  
49 *ACS2/6*-dependent ACC accumulation integrated stomatal development with the  
50 establishment of stomatal density and pattern by mediating  $\text{Ca}^{2+}$  levels in stomatal  
51 lineage cells on the leaf epidermis, and this integration is directly related to the  
52 growth or survival of plants under escalated drought stress.

53 **Key words:** ACC, ACS2, ACS6,  $\text{Ca}^{2+}$ , SDD1, SPCH, stomatal density, stomatal  
54 cluster, drought.

55

56 **Introduction**

57 Stomata are pore structures surrounded by guard cells (GCs) on the leaf epidermis  
58 that regulate the exchange of gases (i.e., H<sub>2</sub>O, CO<sub>2</sub>, or O<sub>2</sub>) between plants and the  
59 environment (Acharya and Assmann, 2009; Zoulias *et al.*, 2018). In evolution  
60 from aquatic to terrestrial, plants had generated stomata on epidermis of aerial part  
61 to facilitate transpiration (pulling water to shoot), and to guarantee plant survival  
62 and life on land (Croxdale, 2000; van Veen and Sasidharan, 2021). For terrestrial  
63 plant, stomata can sense environmental water status, especially water deficit or  
64 drought, and regulate water loss from plant (Acharya and Assmann, 2009; Zoulias  
65 *et al.*, 2018). The ability of stomata to regulate water loss is generally estimated  
66 from stomatal density (number of stomata per unit leaf area) and pattern (whether  
67 stomata are distributed singly or in clusters). Stomatal density and pattern are the  
68 consequences of stomatal space setting; for example, stomatal cluster is formed by  
69 directly contacting stomata with no intervening epidermal cell, or, alternatively,  
70 zero-space establishment (Von Groll *et al.*, 2002; Acharya and Assmann, 2009;  
71 Zoulias *et al.*, 2018). The establishment of stomatal space is, therefore, an  
72 important aspect of plant growth and survival under drought conditions  
73 (Hepworth *et al.*, 2015).

74 The regulation of stomatal development, which undergirds stomatal spacing,  
75 has been extensively investigated. Studies on the model plant *Arabidopsis*  
76 *thaliana* (L.) have shown that stomatal development includes a series of epidermal  
77 cell divisions, in which several basic helix-loop-helix transcription factors, such as  
78 SPCH, MUTE and FAMA, are involved in this process. SPCH initiates stomatal  
79 development to transform meristemoid mother cells (MMCs) into a meristemoids  
80 and a sister cell; MUTE converts a sister cell into the guard mother cells (GMCs);  
81 then FAMA drives GMCs to form a stoma with differentiated GCs (Hamanishi *et*  
82 *al.*, 2012; Zoulias *et al.*, 2018). These findings show clearly that SPCH dominates  
83 stomatal development. This view is better interpreted, for example, the  
84 loss-of-function *spch-1* or *spch-3* homozygous mutant do not produce any stomata  
85 (MacAlister *et al.*, 2007; Pillitteri *et al.*, 2007; Han and Torii, 2016). Furthermore,  
86 SPCH expression is known to implicate the establishment of stomatal density  
87 (Tripathi *et al.*, 2016; Zoulias *et al.*, 2018). However, it is still unclear how SPCH  
88 integrates stomatal developing with space setting.

89 Evidences suggest that the subtilisin-like protease Stomatal Density and  
90 Distribution 1 (SDD1) participates in space setting between stomata on leaf  
91 epidermis, or in the establishment of stomatal density and pattern (Berger and  
92 Altmann, 2000; Casson and Gray, 2008; Serna, 2009; Zoulias *et al.*, 2018), as  
93 evidenced by the following: a loss-of-function *sddl-1* mutant showed a 2- to  
94 4-fold increase in stomatal density and stomatal clustering in all aerial parts,  
95 whereas transgenic *SDD1*-overexpressing plants exhibited a 2- to 3-fold decrease  
96 in stomatal density and arrested stomata (Berger and Altmann, 2000; Von Groll *et*  
97 *al.*, 2002). In line with these findings, *SDD1*-overexpressing plants displayed  
98 diminished transpiration because of a ~25% reduction in abaxial stomatal density  
99 or clustering (Yoo *et al.*, 2010). Evidently, SDD1 activity is negatively correlated  
100 with stomatal density and stomatal clustering ratio. The regulatory mechanism of  
101 SDD1 activity has been uncovered. Significantly, the trihelix transcription factor  
102 GT-2 LIKE 1 (GTL1) binds to the promoter of the *SDD1* gene and inhibits its  
103 expression (Yoo *et al.*, 2010; Weng *et al.*, 2012; Viridi *et al.*, 2015). This  
104 inhibition can be relieved by Ca<sup>2+</sup> increase because Ca<sup>2+</sup>-loaded calmodulin  
105 (Ca<sup>2+</sup>-CaM) destabilizes the docking of GTL1 protein to the *SDD1* promoter (Yoo  
106 *et al.*, 2019). These findings suggest that local Ca<sup>2+</sup> levels are positively correlated  
107 with SDD1 activity as well as stomatal density and the rate of stomatal clustering.  
108 Nevertheless, the manner by which SPCH signals information on stomatal  
109 development to GTL1-controlled *SDD1* expression or stomatal space setting  
110 remains unclear.

111 The non-proteinogenic amino acid 1-aminocyclopropane-1-carboxylate (ACC)  
112 has recently been shown to independently promote stomatal generation by  
113 facilitating the differentiation of GMCs into GCs in *Arabidopsis* leaves (Yin *et al.*,  
114 2019). Unexpectedly, ethylene is not involved in this process (Yin *et al.*, 2019)  
115 even though ACC is the precursor of ethylene (Bleecker and Kende, 2000). In fact,  
116 ACC is known to be involved in stomatal development and spacing (Acharya and  
117 Assmann, 2009). For example, ACC treatments increased the number of stomata  
118 by ~33% on the hypocotyl or cotyledon epidermis in *Arabidopsis* (Saibo *et al.*,  
119 2003), and also induced stomatal clustering (Serna and Fenoll 1997; Berger and  
120 Altmann, 2000). The production of ACC *in vivo* depends on the activity of ACC  
121 synthase (ACS), which converts S-adenosylmethionine to ACC (Bleecker and

122 [Kende, 2000](#)). Various pieces of experimental evidence strongly suggest that ACS  
123 activity is an important mediator of stomata formation. For example, inhibitors of  
124 ACS activity, such as aminoethoxyvinylglycine (AVG) and paclobutrazol (PAC),  
125 were shown to abolish stomatal appearance ([Serna and Fenoll, 1996](#); [Saibo et al.,](#)  
126 [2003](#); [Yin et al., 2019](#)). It is known that ACS is encoded by a multi-gene family  
127 ([Bleecker and Kende, 2000](#)), and that the activity of ACS family members is  
128 unique, overlapping, and spatiotemporally specific ([Tsuchisaka and Theologis,](#)  
129 [2004](#); [Tsuchisaka et al., 2009](#)). The *Arabidopsis* genome contains nine ACS genes  
130 (*ACS1*, *ACS2*, *ACS4–9*, and *ACS11*) that encode authentic enzymes ([Tsuchisaka et](#)  
131 [al., 2009](#)). Interestingly, the expression of ACS genes is induced by drought  
132 ([Dubois et al., 2017](#); [Dubois et al., 2018](#)), which suggests that ACS activity may  
133 be involved in the stomata-based drought response in *Arabidopsis*. Strikingly,  
134 chromatin immune-precipitation assays have indicated that SPCH may regulate  
135 the transcription activity of *ACS2* and *ACS6* genes ([Lau et al., 2014](#)). Nevertheless,  
136 further evidence is needed to clarify how SPCH directs ACS2/6 activity during  
137 stomatal development.

138 In this study, we explored the specific involvement of ACS2/6 activity in the  
139 drought tolerance of *Arabidopsis* seedlings. Our results revealed that the T-DNA  
140 insertion mutants *acs2-1*, *acs6-1*, and *acs2-1acs6-1* are more tolerant to drought  
141 than is the wild-type (WT) control. Subsequent research on the underlying  
142 mechanism indicated that SPCH activates the expression of *ACS2*, *ACS6*, and  
143 *GTL1* by directly binding to their promoters. ACS2/6-dependent ACC  
144 accumulation triggers stomatal development and a Ca<sup>2+</sup> shortage in stomatal  
145 lineage cells, and the latter resulted in the repression of GTL1-controlled SDD1  
146 expression. Stomatal density and cluster on the leaf epidermis are thereby  
147 increased, leading to increased seedling wilting and even death under intensified  
148 drought.

## 149 **Materials and methods**

### 150 **Plant materials and growth conditions**

151 *Arabidopsis thaliana* (Columbia-0 ecotype) was used as WT. The different ACS2  
152 expression lines, including mutant *acs2-1* (CS16564) with a T-DNA insertion,  
153 ACS2-complementation (*ACS2/acs2-1*), ACS2-overexpression (*ACS2-OE*), and

154 *pACS2::ACS2-GUS* lines, have been described previously (Han *et al.*, 2019). The  
155 T-DNA insertion mutant *acs6-1* (CS16569) was obtained from the Arabidopsis  
156 Biological Resource Center (USA). The double mutant *acs2-lacs6-1* was created  
157 by crossing *acs2-1* with *acs6-1*. Seeds of *spch-3* mutant with a T-DNA insertion  
158 were a friendly gift from Professor Sui-wen Hou (MOE Key Laboratory of Cell  
159 Activities and Stress Adaptations, Lanzhou, China). These homozygotes with  
160 T-DNA insertion were screened according to the method provided by the Salk  
161 Institute (<http://signal.salk.edu>). Seeds of the point mutant *spch-1* was a friendly  
162 gift from Professor Xiao-lan Chen (School of Life Sciences, Yunnan University,  
163 China), and was identified by PCR amplification and sequencing of the fragment  
164 containing the mutation site. All primers used in this study are listed in the  
165 [Supplementary Table](#).

166 Seeds of the transgenic *pSPCH::SPCH-GFP* line were a friendly gift from  
167 Professor Xiao-lan Chen (School of Life Sciences, Yunnan University, China),  
168 and GFP expression was detected by hygromycin screening and measurement of  
169 fluorescence in leaves. The seeds of Ca<sup>2+</sup> sensor NES-YC3.6-expressing line were  
170 kindly gifted by Professor Jörg Kudla (Molecular Genetics and Cell Biology of  
171 Plants, University of Munich, Germany). NES-YC3.6-expressing *acs2-lacs6-1*  
172 line was created by crossing *acs2-lacs6-1* with NES-YC3.6-expressing WT plants.  
173 Progeny were selected on kanamycin-containing medium and by measuring  
174 fluorescence in leaves. All F<sub>3</sub> progeny meeting the requirements were used in  
175 subsequent experiments.

176 All seeds were collected and stored under the same conditions. Prior to  
177 experiments, seeds were surface-sterilized and sown on Murashige-Skoog  
178 medium. After 3 days at 4°C in darkness, plates were transferred to a greenhouse  
179 (21 ± 2°C, 70% humidity, 100 μmol m<sup>-2</sup> s<sup>-1</sup> light intensity, and a 16-h light/8-h  
180 dark photoperiod). After germination and growth for 7 days, young seedlings were  
181 transplanted into water-saturated soil. Watering was halted according to the  
182 requirements of each specific drought treatment described in this paper.

### 183 **Creation of transgenic plants**

184 To generate *ACS6*- and *SPCH*-overexpression lines, the full-length coding  
185 sequence (CDS) of *ACS6* or *SPCH* was amplified and cloned into the pSUPER  
186 1300 vector. Each construct was then introduced into *Agrobacterium* strain

187 GV3101 and transformed into the target plants by floral infiltration. The same  
188 method was used to generate the transformants described below. To generate  
189 *ACS6*-complementation (*ACS6/acs6-1*) lines, the promoter and CDS of *ACS6*  
190 were cloned into a pCAMBIA1300 vector, which was transformed into *acs6-1*  
191 plants. To generate *pACS6::ACS6-GUS* lines, the *ACS6* promoter fragment and  
192 full-length CDS were cloned into the promoter-less GUS expression vector  
193 pCAMBIA1391, which was then transformed into WT. To generate  
194 *pSDD1::SDD1-GFP* lines, the promoter fragment and CDS of *SDD1* were cloned  
195 into a pCAMBIA1300 vector, which was then introduced into *acs2-1acs6-1* and  
196 WT. The T<sub>1</sub> transgenic plants were selected on hygromycin-containing medium,  
197 and the T<sub>3</sub> progeny were used for subsequent experiments.

### 198 **Water loss assay**

199 True leaves were collected from 28-day-old plants following previously described  
200 methods (Xie *et al.*, 2019). The fresh weight of leaves was determined  
201 immediately. Leaves of five plants per line were weighed hourly on an electronic  
202 balance (Sartorius, Germany) at room temperature (23°C). Water loss was  
203 calculated using the following formula:  $((W1-W2)/W1) \times 100\%$ , where W1 is the  
204 initial leaf fresh weight, and W2 is the leaf weight at a given time point.

### 205 **Evaluation of stomatal density and rate of stomatal clustering**

206 Stomatal density and clustering ratio were determined according to previously  
207 described methods (de Marcos *et al.*, 2017; Qi *et al.*, 2019). The 6th fully  
208 expanded rosette leaves (count up from cotyledons) were used for analyzing the  
209 stomatal phenotype of 28-day-old seedlings. Strips were peeled from leaf abaxial  
210 epidermis, fixed on a slide, and photographed under a differential contrast  
211 interference microscope (LSM710, Zeiss, Germany). Images were acquired under  
212 the 20× objective (0.18 mm<sup>2</sup>). Randomly selected images are shown in figures.

213 For analyses of stomatal density and clustering rate, 25 plants per line per  
214 plant were examined. In all counts, a stoma was considered to have a pair of  
215 complete guard cells. Stomatal density was calculated as follows: stomatal density  
216 = stomatal number/area (mm<sup>2</sup>). The rate of clustered stomata was calculated as  
217 follows: number of clusters/(number of stomata + number of clusters).

### 218 **RNA extraction and quantitative real-time polymerase chain reaction** 219 **analyses**



220 Total RNA was extracted using a plant RNA MIDI kit (Life-Feng, Shanghai,  
221 China). First-strand complementary DNA (cDNA) was synthesized with a  
222 Reverse Transcription system (Toyobo, Osaka, Japan) and was used as the  
223 template for quantitative real-time polymerase chain reaction (qRT-PCR) analyses  
224 along with 2× SYBR Green I master mix (Vazyme, Nanjing, China). The  
225 qRT-PCR analyses were performed on a Roche 480 real-time PCR system (Roche,  
226 Mannheim, Germany). The RNA levels were calculated as described by Livak  
227 and Schmittgen (2001). The reference gene was *ACTIN8* (AT1G49240).

### 228 **GUS staining**

229 Leaves excised from 21-day-old plants or drought-treated plants were incubated  
230 overnight in darkness at 37°C in GUS staining solution (0.1 M sodium phosphate  
231 buffer, pH 7.0; 0.05 mM K<sub>3</sub>[Fe(CN)<sub>6</sub>]; 0.05 mM K<sub>4</sub>[Fe(CN)<sub>6</sub>]; 1 mg ml<sup>-1</sup> X-Gluc  
232 (Sigma, USA); and 0.1% Triton X-100). After staining, leaves were de-stained  
233 with 75% (v/v) ethanol until the chlorophyll was completely removed. The stained  
234 leaves were photographed using a Nikon Coolpix or Canon 760D digital camera.  
235 Representative photographs are shown in figures.

### 236 **Measurement of ACC content**

237 Leaves from the same line of 21-day-old plants were collected and ground into a  
238 powder. A 0.1-mg aliquot of powdered sample was transferred into an Eppendorf  
239 tube along with 1 ml ultrapure water. To completely extract ACC from leaf tissue,  
240 the sample was further fragmented using an ultrasonic crusher (Branson, Danbury,  
241 CT, USA). The supernatant was collected, the pH was adjusted to <4, and  
242 impurities were removed using 1 ml chloroform. The supernatant was then passed  
243 through a column containing C18 adsorbent (Oasis MCX, 30 μm, 3 cc/60 mg,  
244 Waters, Milford, MA, USA). The column was eluted with 1 M ammonia in water,  
245 with chromatographic methanol as the solvent. The eluent was evaporated to  
246 dryness in a Concentrator Plus evaporator (Eppendorf, Hamburg, Germany) under  
247 vacuum at 30°C and then re-suspended in solution (chromatographic methanol:  
248 0.1% (v/v) acetic acid, 1:9). Samples were analyzed using an Applied Biosystems  
249 MDS SCIEX 4000 QTRAP liquid chromatography-tandem mass spectrometry  
250 system (AB Sciex, Foster City, CA, USA). Standard ACC (Sigma-Aldrich,  
251 Steinheim, Germany) was used for the quantitative analysis.

### 252 **Protein extraction and western blotting**

253 Leaves were collected according to the experimental requirements and ground  
254 into a powder. Powdered samples were transferred to RIPA lysis buffer (Boster  
255 Biotechnology, Wuhan, China) and micro-centrifuged at 16,000 *g* for 15 min at  
256 4°C. The concentration of crude protein in the supernatant was determined using a  
257 NanoDrop 2000 (Thermo Scientific, Wilmington, DE, USA). The crude protein  
258 was separated by 12% SDS-PAGE and then transferred to a nitrocellulose filter  
259 membrane (Millipore, Billerica, MA, USA) using a Trans-Blot Semi-Dry transfer  
260 cell (Bio-Rad, Hercules, CA, USA). The membrane was then incubated at room  
261 temperature for 1-2 h in blocking solution before incubation with anti-GFP mouse  
262 monoclonal antibodies (1:10,000; Proteintech, Chicago, IL, USA) for 2 h at room  
263 temperature. The membrane was subjected to three 10-min washes with TBST and  
264 then incubated overnight at 4°C with horseradish peroxidase-conjugated  
265 secondary antibody (Proteintech). Protein bands were detected using a BeyoECL  
266 Plus kit (Beyotime, Shanghai, China) and then visualized using a Fusion FX7  
267 Spectra system (Vilber Lourmat, Marne-la-Vallée, France). An anti-GAPDH  
268 antibody (1:5000; Proteintech) was used as the loading control.

#### 269 **Chromatin immunoprecipitation analyses**

270 Immature leaves collected from *pSPCH::SPCH-GFP* of 21-day-old plants were  
271 cross-linked using 1% formaldehyde under vacuum for 10 min according to the  
272 EZ-ChIP chromatin IP kit protocol (Thermo Scientific). After washing with  
273 phosphate-buffered saline solution, leaves were ground in liquid nitrogen and then  
274 suspended in SDS lysis buffer containing protease inhibitor cocktail. The DNA  
275 was sheared into small fragments (300–500 bp). The sheared chromatin was  
276 immune-precipitated with GFP antibodies (Proteintech) overnight at 4°C. The  
277 ChIP DNA products were analyzed by RT-qPCR using three pairs of primers  
278 synthesized to amplify approximately 200-bp DNA fragments of the promoter  
279 region of *ACS2* or *ACS6*, which were used in the ChIP analysis. Primers annealing  
280 to promoter regions of two *Arabidopsis* genes lacking an SPCH binding site were  
281 used as negative controls. An unrelated DNA sequence from the *ACTIN8* gene  
282 was used as an internal control.

#### 283 **Transient transcription dual-luciferase assays**

284 Detection was performed according to previously described methods (Bao *et al.*,  
285 2014). The 2400-bp promoter sequence of *ACS2* was divided into 3 fragments (-1

286 to -1000, -900 to -1600, and -1500 to -2400 bp). The 2600-bp promoter sequence  
287 of *ACS6* was also divided into 3 fragments (-1 to -1000, -900 to -2000, and -1900  
288 to -2600 bp), and the -1 to -780 bp promoter sequence of *GTL1* was selected.  
289 Each fragment was cloned into pGreen II 0800-Luc to construct the corresponding  
290 reporter plasmid. The coding sequence of *Arabidopsis SPCH* was cloned into  
291 pGreenII 62-SK to construct the 35S-SPCH effector plasmid. The *Agrobacterium*  
292 strain GV3101 (pSoup-p19) was incubated in yeast mannitol medium and finally  
293 re-suspended in buffer to a final concentration of  $OD_{600} = 1.0$ . Equal amounts of  
294 different combined bacterial suspensions were infiltrated into young leaves of  
295 tobacco plants using a needleless syringe. After 3 days, the infected leaves were  
296 sprayed with D-luciferin (sodium salt) (Yeasen, Shanghai, China) and placed in  
297 darkness for 5 min. Firefly luciferase (LUC) signals were then detected using the  
298 NightSHADE system (LB 985, Berthold Technologies, Bad Wildbad, Germany).  
299 The ratio of LUC activity to Renilla luciferase (REN) activity was measured using  
300 a Dual-Luciferase Reporter Gene Assay kit (Solarbio, Beijing, China). Briefly, the  
301 tobacco leaves were ground in liquid nitrogen, and the extract was incubated in a  
302 low-temperature buffer. The LUC/REN ratio was measured using an enzyme  
303 standard instrument (Tecan, Männedorf, Switzerland).

#### 304 **Monitoring of $Ca^{2+}$ levels in stomatal lineage cells**

305 The  $Ca^{2+}$  levels in stomatal lineage cells were monitored according to [Krebs \*et al.\*](#)  
306 [\(2012\)](#). Immature leaves of *Arabidopsis* seedlings expressing the fluorescence  
307 resonance energy transfer (FRET)-based  $Ca^{2+}$  sensor NES-YC3.6 ([Nagai \*et al.\*,](#)  
308 [2004](#); [Krebs \*et al.\*, 2012](#)) were collected from the same position. During confocal  
309 laser scanning, strips were peeled from leaf abaxial epidermis and then fixed on a  
310 slide on the loading platform. The relative fluorescence intensity of YC3.6 protein  
311 was recorded under a Nikon A1 Plus laser scanning confocal microscope (Nikon,  
312 Tokyo, Japan) with the following scanning parameters: image dimension = 1024 ×  
313 1024, pinhole radius = 38.31  $\mu\text{m}$ , scanning speed = 0.25, zoom = 3×, objective =  
314 60× (water), numerical aperture = 1.27, plan apochromat objective, power = 6%  
315 (445 nm solid laser). Images were acquired every 5s. Emissions from cyan  
316 fluorescent protein (CFP; 465-499 nm) and FRET-dependent cpVenus (525-555  
317 nm) in stomatal lineage were detected simultaneously. The cpVenus/CFP  
318 emission ratio was analyzed using NIS-Elements AR software.

319 **Statistical analysis**

320 All experiments were independently repeated using three biological replicates and  
321 three technical replicates at least. Differences among treatments were compared  
322 using Student's *t*-test. *P*-values < 0.05 (\*) and < 0.01 (\*\*) were considered to  
323 correspond to significant and extremely significant differences, respectively.

324 **Results**

325 **ACS2/6 activation and ACC accumulation facilitated water evaporation from**  
326 **leaves in response to drought**

327 Studies have shown that the activity of ACS2 in rice (Zhang *et al.*, 2013) and  
328 ACS6 in maize (Young *et al.*, 2004) regulates seedling sensitivity to drought, and  
329 that drought induces ACS2/6 activation and ACC accumulation in *Arabidopsis*  
330 (Catalá *et al.*, 2014; Dubois *et al.*, 2018). Therefore, we examined the possible  
331 roles of ACS2 and ACS6 in the drought response of *Arabidopsis* seedlings.

332 The expressions of ACS2 and ACS6 were modified in several genetic  
333 materials. For example, compared with WT, the loss-of-function mutant lines  
334 *acs2-1*, *acs6-1*, and *acs2-1acs6-1* showed significantly reduced ACS2 or ACS6  
335 mRNA levels; the transgenic ACS2-OE(#1) and ACS6-OE(#1) over-expression  
336 lines had significantly elevated ACS2 and ACS6 mRNA levels, respectively; the  
337 transgenic complemented lines ACS2/*acs2-1*(#1) and ACS6/*acs6-1*(#1) exhibited  
338 no changes in ACS2 or ACS6 expression, respectively (Fig. 1A). Interestingly, the  
339 expressions of ACS6 and ACS2 were relatively unchanged in the single mutants  
340 *acs2-1* and *acs6-1*, respectively (Fig. 1B). We first checked the growth  
341 phenotypes of the various ACS2/6 expression lines in response to drought. Under  
342 normal watering (control) conditions, no significant water-losing phenotypes were  
343 apparent among these diverse expression lines. Under gradually intensifying  
344 drought caused owing to stopping watering, however, the phenotypes were  
345 obviously different. In particular, WT, ACS2/*acs2-1*(#1), ACS6/*acs6-1*(#1),  
346 ACS2-OE(#1), and ACS6-OE(#1) seedlings withered and some even died after  
347 water was withheld for 12 days and the soil water content dropped to ~39%,  
348 whereas wilting and drying symptoms were clearly alleviated in the mutants  
349 *acs2-1*, *acs6-1*, and *acs2-1acs6-1* seedlings (Supplementary Fig. S1).  
350 Preliminary data showed that ACS2/6 activation promoted dehydration and

351 wilting of seedlings under drought conditions.

352 The rate of water evaporation from leaves of these lines was monitored under  
353 drought conditions. The water evaporation rate was decreased in *acs2-1*, *acs6-1*,  
354 and *acs2-lacs6-1* leaves, compared with that in WT. This decrease was less  
355 pronounced in the double mutant *acs2-lacs6-1* than in the single mutants *acs2-1*  
356 and *acs6-1* (Fig. 1C). Conversely, the water evaporation rate was significantly  
357 increased in ACS2-OE(#1) and ACS6-OE(#1) compared with that of WT, whereas  
358 no significant change was observed in ACS2/*acs2-1*(#1) or ACS6/*acs6-1*(#1) (Fig.  
359 1C). Data suggest that ACS2/6 activation was positively correlated with the rate  
360 of water evaporation from leaves under drought conditions.

361 The characteristics of ACS2/6 expression in leaves were examined in  
362 response to drought treatment. Histochemical staining revealed that the higher  
363 GUS-marked ACS2/6 expression was in immature leaves, followed by senescent  
364 leaves, and then mature leaves in WT plants; After withholding water for 6 days,  
365 ACS2 and ACS6 expressions in WT were significantly increased in immature  
366 leaves, slightly increased in mature leaves, and unchanged in senescent leaves  
367 (Fig. 2A). Meantime, quantitative PCR showed the same results (Fig. 2B). This is,  
368 ACS2 and ACS6 expressions were always higher in senescent leaves regardless of  
369 drought, whereas both expressions increased in response to drought in  
370 non-senescent leaves. Next, ACS2/6-dependent ACC accumulation was analyzed  
371 in leaves. Under normal conditions, ACC mainly accumulated in immature and  
372 senescent leaves of WT seedlings, whereas ACC accumulated primarily in  
373 immature leaves in response to a 6-day halt in watering. More specifically, ACC  
374 levels were, respectively, 1.94- and 1.33-times higher in immature and mature  
375 leaves of WT after withholding water (Fig. 2C). In contrast to WT, the double  
376 mutant *acs2-lacs6-1* did not significantly accumulate ACC in the leaves in  
377 response to drought (Fig. 2C). These data indicate that drought induced ACS2/6  
378 activation and ACC accumulation in non-senescent leaves of *Arabidopsis*  
379 seedlings.

### 380 ACS2/6 activation affected stomatal density and pattern on leaf abaxial 381 epidermis

382 Evidences suggest that the ACS activity was required for stomatal development  
383 (Serna and Fenoll, 1996; Saibo *et al.*, 2003; Young *et al.*, 2004; Zhang *et al.*, 2013;

384 [Lau et al., 2014](#); [Yin et al., 2019](#)), we thus analyzed the effects of ACS2/6 activity  
385 on stomatal density and pattern on the leaf abaxial epidermis.

386 Images of stomata on the abaxial epidermis of the 6th (count up from  
387 cotyledon) mature leaves of the various ACS2/6 expression lines under normal  
388 and drought conditions are shown in [Fig. 3A](#). Under normal watering conditions,  
389 stomatal density and the percentage of clustering were slightly decreased in the  
390 mutants *acs2-1*, *acs6-1*, and *acs2-lacs6-1*, but slightly increased in ACS2-OE(#1)  
391 and ACS6-OE(#1), compared with that in WT ([Fig. 3B](#)). After halting watering for  
392 6 days, however, stomatal density was significantly reduced in *acs2-1* ( $177.8 \pm 8.2$   
393  $\text{mm}^{-2}$ ), *acs6-1* ( $183.3 \pm 6.2 \text{ mm}^{-2}$ ), and *acs2-lacs6-1* ( $161.1 \pm 8.2 \text{ mm}^{-2}$ ), but  
394 significantly increased in ACS2-OE(#1) ( $255.6 \pm 6.9 \text{ mm}^{-2}$ ) and ACS6-OE(#1)  
395 ( $261.1 \pm 4.9 \text{ mm}^{-2}$ ), compared with that in WT ( $205.6 \pm 5.4 \text{ mm}^{-2}$ ) ([Fig. 3B](#)). The  
396 percentage of the pairs of directly contacting stomata was significantly higher in  
397 ACS2-OE(#1) (~ 3.1%) and ACS6-OE(#1) (~ 2.7%) than in WT (~ 0.2%). In  
398 contrast, the stomatal clustering rates were lower in the mutants *acs2-1* (~ 0.12%),  
399 *acs6-1* (~ 0.15%) and *acs2-lacs6-1* (~ 0.1%) than in WT ([Fig. 3C](#)). Evidently,  
400 ACS2/6 activation increased stomatal density and cluster on the abaxial epidermis.  
401 In addition, application of 5–10  $\mu\text{M}$  ACC also significantly increased the stomatal  
402 density and clustered stomata on the leaf abaxial epidermis of WT seedlings  
403 ([Supplementary Fig. S2](#)). This validation experiments indicate that appropriate  
404 concentrations of ACC increased stomatal density and cluster on leaf epidermis.

#### 405 **SPCH could bind to promoters of ACS2/6 and regulate their expression**

406 The above data suggest that the effect of ACS2/6-dependnet ACC accumulation is  
407 similar to that of SPCH ([Tripathi et al., 2016](#); [Zoulias et al., 2018](#)) in promoting  
408 stomatal density on the leaf epidermis, we speculated that SPCH may mediate  
409 ACS2/6 expression activity. Although a profile list generated by genome-wide  
410 ChIP-based sequencing of the targets of SPCH included both ACS2 and ACS6  
411 ([Lau et al., 2014](#)), direct experimental evidence was still lacking.

412 To explore whether SPCH affect ACS2 and ACS6 expression, we checked  
413 mRNA levels of ACS2 and ACS6 in the loss-of-function *spch-1* and *spch-3* mutant  
414 seedlings, respectively. In order to explore the stomatal development on the  
415 epidermis of true leaves, the heterozygote of *spch-1* and *spch-3* were used,  
416 because the two homozygotes cannot grow true leaf ([MacAlister et al., 2007](#);

417 [Pillitteri et al., 2007](#); [Han and Torii, 2016](#)). Observations indicated that both  
418 *spch-1* and *spch-3* had significantly reduced *ACS2* and *ACS6* mRNA levels,  
419 respectively, whereas *SPCH*-OE lines had significantly increased mRNA levels,  
420 compared with the WT control ([Fig. 4A](#)). Interestingly, drought similarly induced  
421 the expressions of *SPCH*, *ACS2*, and *ACS6* genes ([Fig. 4B](#)). Data implies that  
422 *SPCH* activity was positively correlated with the expression of *ACS2* and *ACS6*.

423 To confirm this experimentally, we used ChIP assays to detect the interaction  
424 between the transcription factor *SPCH* and the promoters of *ACS2* and *ACS6*. The  
425 *in silico* analyses revealed three E-box motifs in the 3.0-kb promoter region of the  
426 *ACS2* gene: CGCGTG and CACGTG (at -1079 and -1090), collectively named  
427 *ACS2*-P1 because of their close proximity, and CACGTG (at -2326), designated  
428 as *ACS2*-P2. Only one E-box motif was present in the 3.0-kb promoter region of  
429 the *ACS6* gene: CACGTG (at -2537), named *ACS6*-P1 ([Fig. 4C](#)). After randomly  
430 selecting DNA fragments from their promoter regions with the same length as the  
431 E-boxes (named *ACS2*-P and *ACS6*-P) as the reference, ChIP assays were  
432 performed to measure levels of immune-precipitated DNA fragments by *SPCH*  
433 protein *in vivo*. In these assays, the abundance of DNA fragments from *ACS2*  
434 promoters *ACS2*-P1 and *ACS2*-P2 was, respectively, 6.13- and 1.18-fold higher  
435 than that of the control *ACS2*-P ([Fig. 4D](#)). Similarly, the abundance of *ACS6*-P1  
436 immune-precipitated by *SPCH* protein was 4.57-fold higher than that of the  
437 control *ACS6*-P ([Fig. 4D](#)). Next, we conducted transient transcription activity  
438 assays to verify the binding of *SPCH* to the promoters of *ACS2* and *ACS6*.  
439 According to the results, the fluorescence intensity of LUC linked to the specific  
440 promoter fragment of *ACS2* (-900 to -1600 bp, containing *ACS2*-P1) was  
441 increased in the presence of *SPCH*, with LUC activity 4.2-times higher than that  
442 of the blank LUC control ([Fig. 4E, F](#)). Similarly, the activity of LUC linked to the  
443 promoter fragment of *ACS6* (-1900 to -2600 bp, containing *ACS6*-P1) in the  
444 presence of *SPCH* was 3.7-times higher than that of the blank LUC control ([Fig.](#)  
445 [4E, F](#)). This stimulatory effect was specific, as *SPCH* did not induce LUC activity  
446 alone or when linked to E-box-free promoter fragments of *ACS2* or *ACS6*  
447 ([Supplementary Fig. S3](#)). In other words, *SPCH* directed the transcription of *ACS2*  
448 or *ACS6* by docking to each of their promoter regions.

449 To verify that *SPCH* promoted *ACS2/6* expression, we monitored the effects

450 of SPCH activity on ACC levels. The results showed that the  
451 SPCH-overexpressing lines *SPCH-OE*(#1), *SPCH-OE*(#2), and *SPCH-OE*(#3)  
452 had significantly increased ACC levels (Fig. 5A), but the mutants *spch-1* or  
453 *spch-3* had reduced ACC levels in immature leaves, as compared with the ACC  
454 levels in leaves of WT (Fig. 5B). Evidently, SPCH-directed *ACS2/6* expression  
455 was directly related to ACC accumulation in immature leaves. Further  
456 observations helped to explain how SPCH mediated stomatal development *via*  
457 *ACS2/6*-dependent ACC production. The single mutant *spch-1*, the double mutant  
458 *acs2-lacs6-1*, and the triple mutant *spch-lacs2-lacs6-1* had significantly reduced  
459 stomatal densities under normal or drought conditions, compared with WT (Fig.  
460 5C, D). In addition, the stomatal density on leaves was lower in the triple mutant  
461 *spch-lacs2-lacs6-1* than in its parents *spch-1* and *acs2-lacs6-1* (Fig. 5C, D).  
462 Notably, *ACS2*- or *ACS6*-overexpression in *spch-1* reversed the reduction in  
463 stomatal density (Fig. 5D). These observations suggest that SPCH activity  
464 induced *ACS2/6* activation and ACC accumulation.

#### 465 **ACC accumulation decreased SDD1 expression levels in leaves**

466 Evidences have shown that *SDD1* expression reduces stomatal density and cluster  
467 (Yoo *et al.*, 2010; Yoo *et al.*, 2019), but exogenously applied ACC increases  
468 stomatal density and cluster (Serna and Fenoll, 1996; Saibo *et al.*, 2003; Acharya  
469 and Assmann, 2009). We therefore verified whether ACC cooperates with *SDD1*  
470 to establish stomatal density and cluster.

471 The effect of *ACS2/6*-dependent ACC accumulation on *SDD1* expression  
472 was surveyed in immature leaves. The *SDD1* mRNA levels in *acs2-1*, *acs6-1*,  
473 *acs2-lacs6-1*, *ACS2-OE*(#1), and *ACS6-OE*(#1) were, respectively, 1.88-, 1.89-,  
474 2.18-, 0.64-, and 0.67-fold that in WT (Fig. 6A). This result suggests that *SDD1*  
475 expression was negatively correlated with *ACS2/6* activation in immature leaves.  
476 Further monitoring of *SDD1* protein levels by western blotting indicated that  
477 GFP-marked *SDD1* protein levels in immature leaves were higher in *acs2-lacs6-1*  
478 than in WT under drought conditions (Fig. 6B). Likewise, ACC treatment reduced  
479 protein levels of *SDD1* in WT leaves compared with the blank control (Fig. 6B).  
480 This result is consistent with the expectation that ACC treatment would reduce  
481 *SDD1* mRNA transcript levels in immature leaves of WT (Supplementary Fig. S4).  
482 These observations suggest that *ACS2/6*-generated ACC impeded *SDD1* gene



483 expression and SDD1 protein levels, thereby increasing stomatal density and  
484 cluster on the leaf epidermis.

#### 485 **SPCH activity positively regulated GTL1 expression**

486 The trihelix transcription factor GTL1 is known to be the direct controller of  
487 SDD1 activity (Yoo *et al.*, 2010; Weng *et al.*, 2012; Viridi *et al.*, 2015), and  
488 ChIP-sequencing data suggest that GTL1 is a target of SPCH (Lau *et al.*, 2014).  
489 However, experimental evidence that SPCH affects GTL1 activity was lacking.

490 We investigated the effects of SPCH activity on *GTL1* expression. The *GTL1*  
491 mRNA levels in *spch-1*, *spch-3*, and *SPCH-OE*(#3) were, respectively, 0.43-,  
492 0.36-, or 4.47-fold higher than that in WT (Fig. 7A). These data suggest that  
493 SPCH promoted *GTL1* expression. We verified this promoting effect by carrying  
494 out a transient transcription activity assay in tobacco leaves. Imaging analyses  
495 indicated that the presence of SPCH protein increased LUC fluorescence intensity  
496 linked to the specific promoter fragment of *GTL1* compared with that of the blank  
497 control, LUC alone (Fig. 7B). Interestingly, SPCH-stimulated LUC activity was  
498 4.1-times higher than that of LUC alone (Fig. 7C), indicating that SPCH activated  
499 *GTL1* expression by binding to its promoter.

#### 500 **ACC buffered Ca<sup>2+</sup> activity in stomatal lineage cells**

501 Studies have shown that Ca<sup>2+</sup>-loaded CaM can relieve the inhibition of *SDD1*  
502 expression by GTL1, while the susceptibility of GTL1 to Ca<sup>2+</sup> levels mainly  
503 occurs in stomatal lineage (Weng *et al.*, 2012; Viridi *et al.*, 2015; Yoo *et al.*, 2019).  
504 Thus, we monitored how ACC mediates Ca<sup>2+</sup> levels in stomatal lineage cells on  
505 the leaf epidermis. Using the Ca<sup>2+</sup> fluorescence probe Fluo-4/AM, we  
506 preliminarily evaluated the Ca<sup>2+</sup> levels in stomatal lineage cells on the immature  
507 leaf epidermis. Under normal conditions, the Ca<sup>2+</sup> levels in stomatal lineage cells  
508 were slightly higher in *acs2-lacs6-1* than in WT. However, after halting watering  
509 for 6 days, the Ca<sup>2+</sup> levels in stomatal lineage cells were higher in *acs2-lacs6-1*  
510 than in WT (Supplementary Fig. S5). This hints that the decreased ACC  
511 accumulation increased Ca<sup>2+</sup> levels in stomatal lineage cells.

512 The Ca<sup>2+</sup>-sensitive yellowameleon protein YC3.6 has been developed as a  
513 Ca<sup>2+</sup> biosensor (Krebs *et al.*, 2012; Behera *et al.*, 2017). Therefore, we created  
514 NES-YC3.6 expressing *acs2-lacs6-1* lines to obtain *in vivo* data on Ca<sup>2+</sup>  
515 accumulation in the stomatal lineage cells on the leaf epidermis. Both

516 fluorescence-symbolized and cpVenus/CFP ratio-labelled  $\text{Ca}^{2+}$  levels were  
517 analyzed. Under normal watering conditions, the fluorescence intensity of YC3.6  
518 protein was slightly higher in *acs2-Iacs6-1* than in WT (Fig. 8A). Moreover, the  
519 cpVenus/CFP ratio was slightly higher in *acs2-Iacs6-1* than in WT (Fig. 8B).  
520 After halting watering for 6 days, the fluorescence intensity of YC3.6 protein was  
521 significantly higher in *acs2-Iacs6-1* than in WT (Fig. 8A). Specifically, the  $\text{Ca}^{2+}$   
522 levels in the stomatal lineage cells was 3.38-times higher in *acs2-Iacs6-1* than in  
523 WT (Fig. 8B). This result shows that ACC accumulation in leaves significantly  
524 reduced  $\text{Ca}^{2+}$  levels or activity in stomatal lineage cells.

## 525 Discussion

526 These findings reveal the specific role of ACS2/6 activity in the establishment of  
527 stomatal density and pattern under drought. A schematic overview of the  
528 inter-relationships among these processes is provided in Fig. 9.

529 The activation of ACS2/6 lays the foundation for ACC-induced stomatal  
530 generation and pattern under drought. According to our data, stomatal density and  
531 clustering on the leaf epidermis were reduced in loss-of-function mutants *acs2-1*,  
532 *acs6-1*, and *acs2-Iacs6-1*, but were increased in ACS2- and ACS6-overexpression  
533 lines (Fig. 3); to put it in another way, drought-activated ACS2/6 increased  
534 stomatal density and cluster, and these facilitated stomata-based water evaporation,  
535 in turn, seedlings withered and some even died with drought escalating. This  
536 finding provides a genetic explanation for the decrease in stomatal density and  
537 clustering caused by inhibitors of ACS activity, such as AVG or PAC, in  
538 *Arabidopsis* (Serna and Fenoll, 1996; Saibo *et al.*, 2003; Yin *et al.*, 2019), and  
539 also provide theoretical explanations why ACS2- or ACS6-deficient rice (Zhang  
540 *et al.*, 2013) or maize (Young *et al.*, 2004) are less sensitive to water deficit than  
541 are WT controls. Considering the specificity of ACS activity (Tsuchisaka and  
542 Theologis, 2004; Tsuchisaka *et al.*, 2009; Han *et al.*, 2019; Lv *et al.*, 2019), we  
543 presume that ACS2/6 activation is specific to stomatal development and spacing  
544 on the leaf epidermis when *Arabidopsis* seedlings are under drought. Because  
545 drought can induce ACS2/6 activation and ACC accumulation (Catalá *et al.*, 2014;  
546 Dubois *et al.*, 2018), the observed increase in stomatal density and cluster under  
547 drought conditions (Fig. 2, 3) is easily understandable. Simply,  
548 ACS2/6-dependent ACC accumulation increases the susceptibility of seedlings to

549 drought. Furthermore, activated ACS2 and ACS6 may function in parallel, as  
550 growth phenotypes (Supplementary Fig. S1), stomatal densities (Fig. 3B), and  
551 clustering (Fig. 3C) were similar among *acs2-1*, *acs6-1*, and *acs2-1acs6-1*  
552 mutants, and the expressions of ACS6 and ACS2 were relatively unaffected in the  
553 two single mutants *acs2-1* and *acs6-1*, respectively (Fig. 1B). Importantly, our  
554 results show that SPCH separately regulates the expression of ACS2 and ACS6 by  
555 binding to their promoters (Fig. 4). We speculate that ACS2 and ACS6 jointly  
556 ensure plants to fully respond to frequent drought stimuli.

557 ACS2/6-dependent ACC production is an important node of SPCH-based  
558 regulation of stomatal development and pattern. In line with a previous prediction  
559 (Lau *et al.*, 2014), our results provide evidence that SPCH acts as a transcription  
560 factor to control the expression of ACS2 and ACS6 (Fig. 4). The ability of SPCH  
561 to promote ACS2 and ACS6 expression was evidenced by the fact, for example,  
562 that *spch-1* and *spch-3* mutants showed reduced expressions of these genes (Fig. 4)  
563 and ACC content, whereas SPCH overexpression led to increased ACC levels (Fig.  
564 5). This finding explains why plant tolerance to osmotic stress requires reduced  
565 SPCH activity (Han and Torii, 2016; Tripathi *et al.*, 2016; Zoulias *et al.*, 2018).

566 ACS2/6-generated ACC accumulation acts as a bridge between  
567 SPCH-initiated stomatal individual development and SDD1-directed stomatal  
568 spacing between stomata. Evidence for this conclusion is as follows: First, ACC  
569 mimics SPCH to reduce SDD1 activity, thereby increasing stomatal density and  
570 cluster. The mutants *acs2-1*, *acs6-1*, and *acs2-1acs6-1* seedlings (Fig. 2)  
571 mimicked transgenic *SDD1*-overexpressing plants by showing reduced stomatal  
572 density and cluster on leaves. Consistent with this observation, both the *sdd1-1*  
573 mutant (Von *et al.*, 2002) and ACS2- and ACS6-overexpressing plants (Fig. 6)  
574 exhibited increased stomatal density and cluster on the leaves. Second,  
575 ACC-associated Ca<sup>2+</sup> insufficiency reduced SDD1 activity, or, alternatively, Ca<sup>2+</sup>  
576 activity, in stomatal lineage cells, so that ACC levels were linked to SDD1  
577 expression. Our findings indicated that Ca<sup>2+</sup> levels in stomatal lineage cells on the  
578 leaf epidermis were higher in *acs2-1acs6-1* plants than in WT (Fig. 8;  
579 Supplementary Fig. S5). This suggests that ACC accumulation inhibits SDD1  
580 activity by controlling Ca<sup>2+</sup> activity in stomatal lineage cells. This result is  
581 reasonable because a Ca<sup>2+</sup> shortage can stabilize the binding of GTL1 to the *SDD1*

582 promoter to prevent its expression in stomatal lineage cells (Yoo *et al.*, 2019).  
583 These findings explicate the mechanisms in the recent discovery that Ca<sup>2+</sup> activity  
584 intensifies stomata-based water evaporation from leaves of *Arabidopsis* seedlings  
585 under drought conditions (Teardo *et al.*, 2019).

586 In brief, these findings first indicated that the ACS2/6 activity may  
587 specifically integrated SPCH-initiated stomatal individual development with  
588 SDD1-directed space setting between stomata under drought. This integration  
589 increased stomatal density and cluster on the leaf epidermis under moderate  
590 drought, which laid foundation for seedling wilting and death with drought  
591 escalating. The promotion of moderate drought to stomatal density and cluster  
592 provided a hint that the evolutionary memory of plants from aquatic to terrestrial  
593 may be evoked (Croxdale, 2000); while this evolutionary memory appears to  
594 override routine terrestrial regulation determining stomatal development  
595 (Croxdale, 2000; van Veen and Sasidharan, 2021).

#### 596 **Acknowledgements**

597 This work was supported by the National Natural Science Foundation of China  
598 (31970735, 31271510) to Jing Jiang. We thank Professor Xiao-lan Chen (School  
599 of Life Sciences, Yunnan University, China), Professor Sui-wen Hou (MOE Key  
600 Laboratory of Cell Activities and Stress Adaptations, Lanzhou, China), and  
601 Professor Jörg Kudla (Institute of Biology and Biotechnology of Plants,  
602 University of Munster, Germany) provided seeds of *spch-1*, *spch-3*, the transgenic  
603 *pSPCH::SPCH-GFP* line and the Ca<sup>2+</sup> sensor NES-YC3.6-expressing line,  
604 respectively.

#### 605 **Authors' contributions**

606 JJ and CPS formulated the experimental strategy. MZJ, JJ, LYL and CG  
607 performed experiments. JJ and MZJ wrote the paper.

#### 608 **Data availability**

609 All data relevant to this study are presented in figures and supplementary data.

#### 610 **Supplementary data**

611 *Table.* Primer list.

612 *Fig. S1.* ACS2- or ACS6-based growth phenotype of *Arabidopsis* seedling or with

613 drought treatment.

614 *Fig. S2.* ACC-increased stomatal density and percentage of clustering stomata on  
615 leaf epidermis.

616 *Fig. S3.* The control experiment of SPCH-activated ACS2 or ACS6 expression,  
617 respectively, in the transient transcription dual-luciferase assay system.

618 *Fig. S4.* RT-qPCR analysis on the inhibitory effect of ACC treatment on the  
619 expression activity of *SDD1* gene in immature leaves.

620 *Fig. S5.* Ca<sup>2+</sup>-stimulated Fluo-4/AM fluorescence intensity in stomatal lineage  
621 cells on leaf epidermis.

## 622 **References**

623 **Acharya BR, Assmann SM.** 2009. Hormone interactions in stomatal function. *Plant*  
624 *Molecular Biology* **69**, 451–462.

625 **Bao Y, Wang C, Jiang C, Pan J, Zhang G, Liu H, Zhang H.** 2014. The tumor necrosis  
626 factor receptor-associated factor (TRAF)-like family protein SEVEN IN ABSENTIA 2  
627 (SINA2) promotes drought tolerance in an ABA-dependent manner in *Arabidopsis*. *New*  
628 *Phytologist* **202**, 174–187.

629 **Behera S, Long Y, Schmitz-Thom I, et al.** 2017. Two spatially and temporally distinct  
630 Ca<sup>2+</sup> signals convey *Arabidopsis thaliana* responses to K<sup>+</sup> deficiency. *New Phytologist*  
631 **213**, 739–750.

632 **Berger D, Altmann T.** 2000. A subtilisin-like serine protease involved in the regulation  
633 of stomatal density and distribution in *Arabidopsis thaliana*. *Genes Development* **14**,  
634 1119–1131.

635 **Bleecker AB, Kende H.** 2000. Ethylene: a gaseous signal molecule in plants. *Annual*  
636 *Review of Cell and Developmental Biology* **16**, 1–18.

637 **Casson S, Gray JE.** 2008. Influence of environmental factors on stomatal development.  
638 *New Phytologist* **178**, 9–23.

639 **Catalá R, López-Cobollo R, Mar Castellano M, Angosto T, Alonso JM, Ecker JR,**  
640 **Salinas J.** 2014. The *Arabidopsis* 14-3-3 protein RARE COLD INDUCIBLE 1A links

641 low-temperature response and ethylene biosynthesis to regulate freezing tolerance and  
642 cold acclimation. *Plant Cell* **26**, 3326–3342.

643 **Croxdale JL.** 2000. Stomatal patterning in angiosperms. *American Journal of Botany* **87**,  
644 1069-1080.

645 **de Marcos A, Houbaert A, Triviño M, Delgado D, Martín-Trillo M, Russinova E,**  
646 **Fenoll C, Mena M.** 2017. A mutation in the bHLH domain of the SPCH transcription  
647 factor uncovers a BR-dependent mechanism for stomatal development. *Plant Physiology*  
648 **174**, 823–842.

649 **Dubois M, Claeys H, Van den Broeck L, Inzé D.** 2017. Time of day determines  
650 *Arabidopsis* transcriptome and growth dynamics under mild drought. *Plant Cell*  
651 *Environment* **40**, 180–189.

652 **Dubois M, Van den Broeck L, Inzé D.** 2018. The pivotal role of ethylene in plant  
653 growth. *Trends Plant Science* **23**, 311–323.

654 **Hamanishi ET, Thomas BR, Campbell MM.** 2012. Drought induces alterations in the  
655 stomatal development program in *Populus*. *Journal of Experimental Botany* **63**,  
656 4959–4971.

657 **Han S, Jia MZ, Yang JF, Jiang J.** 2019. The integration of ACS2-generated ACC with  
658 GH3-mediated IAA homeostasis in NaCl-stressed primary root elongation of *Arabidopsis*  
659 seedling. *Plant Growth Regulation* **88**, 151–158.

660 **Han SK, Torii KU.** 2016. Lineage-specific stem cells, signals and asymmetries during  
661 stomatal development. *Development* **143**, 1259–1270.

662 **Hepworth C, Doheny-Adams T, Hunt L, Cameron DD, Gray JE.** 2015. Manipulating  
663 stomatal density enhances drought tolerance without deleterious effect on nutrient uptake.  
664 *New Phytologist* **208**, 336–341.

665 **Krebs M, Held K, Binder A, Hashimoto K, Den Herder G, Parniske M, Kudla J,**  
666 **Schumacher K.** 2012. FRET-based genetically encoded sensors allow high-resolution  
667 live cell imaging of Ca<sup>2+</sup> dynamics. *The Plant Journal* **69**, 181–192.

668 **Lau OS, Davies KA, Chang J, Adrian J, Rowe MH, Ballenger CE, Bergmann DC.**  
669 2014. Direct roles of SPEECHLESS in the specification of stomatal self-renewing cells.

- 670 Science **345**, 1605–1609.
- 671 **Livak KJ, Schmittgen TD.** 2001. Analysis of relative gene expression data using  
672 real-time quantitative PCR and the  $2^{-\Delta\Delta C(T)}$  method. *Methods* **25**, 402–408.
- 673 **Lv SF, Jia MZ, Zhang SS, Han S, Jiang J.** 2019. The dependence of leaf senescence on  
674 the balance between 1-aminocyclopropane-1-carboxylate acid synthase 1 (ACS1)  
675 -catalyzed ACC generation and nitric oxide associated 1 (NOS1)-dependent NO  
676 accumulation in *Arabidopsis*. *Plant Biology* **21**, 595–603.
- 677 **MacAlister CA, Ohashi-Ito K, Bergmann DC.** 2007. Transcription factor control of  
678 asymmetric cell divisions that establish the stomatal lineage. *Nature* **445**, 537–540.
- 679 **Pillitteri LJ, Sloan DB, Bogenschutz NL, Torii KU.** 2007. Termination of asymmetric  
680 cell division and differentiation of stomata. *Nature* **445**, 501–505.
- 681 **Qi SL, Lin QF, Feng XJ, Han HL, Liu J, Zhang L, Wu S, Le J, Blumwald E, Hua XJ.**  
682 2019. IDD16 negatively regulates stomatal initiation via trans-repression of SPCH in  
683 *Arabidopsis*. *Plant Biotechnol Journal* **17**, 1446–1457.
- 684 **Saibo NJ, Vriezen WH, Beemster GT, Van Der Straeten D.** 2003. Growth and stomata  
685 development of *Arabidopsis* hypocotyls are controlled by gibberellins and modulated by  
686 ethylene and auxins. *Plant Journal* **33**, 989–1000.
- 687 **Serna L, Fenoll C.** 1996. Ethylene induces stomata differentiation in *Arabidopsis*.  
688 *International Journal of Developmental Biology* **1**, 123S–124S.
- 689 **Serna L, Fenoll C.** 1997. Tracing the ontogeny of stomatal clusters in *Arabidopsis* with  
690 molecular markers. *Plant Journal* **12**, 747–755.
- 691 **Serna L.** 2009. Cell fate transitions during stomatal development. *Bioessays* **31**,  
692 865–873.
- 693 **Teardo E, Carraretto L, Moscatiello R, et al.** 2019. A chloroplast-localized  
694 mitochondrial calcium uniporter transduces osmotic stress in *Arabidopsis*. *Nature Plants* **5**,  
695 581–588.
- 696 **Tripathi P, Rabara RC, Reese RN, et al.** 2016. A toolbox of genes, proteins,  
697 metabolites and promoters for improving drought tolerance in soybean includes the  
698 metabolite coumestrol and stomatal development genes. *BMC Genomics* **17**, 102.

- 699 **Tsuchisaka A, Theologis A.** 2004. Unique and overlapping expression patterns among  
700 the *Arabidopsis* 1-amino-cyclopropane-1-carboxylate synthase gene family members.  
701 *Plant Physiology* **136**, 2982–3000.
- 702 **Tsuchisaka A, Yu G, Jin H, Alonso JM, Ecker JR, Zhang X, Gao S, Theologis A.**  
703 2009. A combinatorial interplay among the 1-aminocyclopropane-1-carboxylate isoforms  
704 regulates ethylene biosynthesis in *Arabidopsis thaliana*. *Genetics* **183**, 979–1003.
- 705 **van Veen H, Sasidharan R.** 2021. Shape shifting by amphibious plants in dynamic  
706 hydrological niches. *New Phytologist* **229**, 79-84.
- 707 **Virdi AS, Singh S, Singh P.** 2015. Abiotic stress responses in plants: roles of  
708 calmodulin-regulated proteins. *Frontiers in Plant Science* **6**, 809.
- 709 **Von Groll U, Berger D, Altmann T.** 2002. The subtilisin-like serine protease SDD1  
710 mediates cell-to-cell signaling during *Arabidopsis* stomatal development. *Plant Cell* **14**,  
711 1527–1539.
- 712 **Weng H, Yoo CY, Gosney MJ, Hasegawa PM, Mickelbart MV.** 2012. Poplar GTL1 is  
713 a Ca<sup>2+</sup>/calmodulin-binding transcription factor that functions in plant water use efficiency  
714 and drought tolerance. *PLoS One* **7**, e32925.
- 715 **Xie Z, Nolan T, Jiang H, Tang B, Zhang M, Li Z, Yin Y.** 2019. The AP2/ERF  
716 transcription factor tiny modulates brassinosteroid-regulated plant growth and drought  
717 responses in *Arabidopsis*. *Plant Cell* **31**, 1788–1806.
- 718 **Yin J, Zhang X, Zhang G, Wen Y, Liang G, Chen X.** 2019.  
719 Aminocyclopropane-1-carboxylic acid is a key regulator of guard mother cell terminal  
720 division in *Arabidopsis thaliana*. *Journal of Experimental Botany* **70**, 897–908.
- 721 **Yoo CY, Mano N, Finkler A, Weng H, Day IS, Reddy ASN, Poovaiah BW, Fromm  
722 H, Hasegawa PM, Mickelbart MV.** 2019. A Ca<sup>2+</sup>/CaM-regulated transcriptional switch  
723 modulates stomatal development in response to water deficit. *Scientific Reports* **9**, 12282.
- 724 **Yoo CY, Pence HE, Jin JB, Miura K, Gosney MJ, Hasegawa PM, Mickelbart MV.**  
725 2010. The *Arabidopsis* GTL1 transcription factor regulates water use efficiency and  
726 drought tolerance by modulating stomatal density via transrepression of SDD1. *Plant Cell*  
727 **22**, 4128–4141.



- 728 **Young TE, Meeley RB, Gallie DR.** 2004. ACC synthase expression regulates leaf  
729 performance and drought tolerance in maize. *Plant Journal* **40**, 813–825.
- 730 **Zhang H, Zhang J, Quan R, Pan X, Wan L, Huang R.** 2013. EAR motif mutation of  
731 rice OsERF3 alters the regulation of ethylene biosynthesis and drought tolerance. *Planta*  
732 **237**, 1443–1451.
- 733 **Zoulias N, Harrison EL, Casson SA, Gray JE.** 2018. Molecular control of stomatal  
734 development. *Biochemical Journal* **475**, 441–454.
- 735

736 **Figure legends**

737 **Fig. 1.** Effect of ACS2/6 expression on water loss from leaves of *Arabidopsis*  
738 seedlings.

739 (A) qRT-PCR analysis of ACS2 and ACS6 mRNA levels in various lines,  
740 including the WT; loss-of-function mutants *acs2-1*, *acs6-1*, and *acs2-1acs6-1*;  
741 overexpression lines ACS2-OE(#1) and ACS6-OE(#1); and complementation lines  
742 ACS2/*acs2-1*(#1) and ACS6/*acs6-1*(#1). *ACTIN8* was used as a reference gene.  
743 Experiments were repeated three times. Values are means  $\pm$  SD (Student's *t*-test; \*,  
744  $P < 0.05$ ; \*\*,  $P < 0.01$ ).

745 (B) qRT-PCR analysis of ACS6 mRNA levels in *acs2-1* and ACS2 mRNA levels in  
746 *acs6-1*. Experiments were repeated three times with similar results.

747 (C) Relative rate of water loss over time from detached rosette leaves of  
748 28-day-old plants. All true leaves of five plants of the same line grown under  
749 identical conditions were collectively weighed every hour. The data represent the  
750 water loss percentage at a given time point, calculated as follows: ((initial weight  
751 – weight at each time point) / initial weight)  $\times$  100. Experiments were repeated at  
752 least three times with similar results. Values are means  $\pm$  SD (Student's *t*-test; \*,  $P$   
753  $< 0.05$ ).

754

755 **Fig. 2.** Effects of drought on ACS2 and ACS6 expressions and ACC accumulation  
756 in leaves of different ages.

757 (A) ACS2 or ACS6 expression was monitored in immature, mature and  
758 senescence leaves of recombinant *pACS2::ACS2-GUS* or *pACS6::ACS6-GUS* lines,  
759 respectively, with or without drought treatment. Representative images are shown.  
760 Experiments were repeated three times with similar results.

761 (B) ACS2 or ACS6 expression was monitored by qPCR in immature, mature and  
762 senescence leaves of WT, respectively, with or without drought treatment.  
763 Representative images are shown. Experiments were repeated three times with  
764 similar results. Values are means  $\pm$  SD (Student's *t*-test; \*,  $P < 0.05$ ).

765 (C) HPLC analysis of ACC accumulation in leaves of 21-day-old seedlings with  
766 or without drought treatment. Experiments were repeated three times with similar  
767 results. Values are means  $\pm$  SD (Student's *t*-test; \*,  $P < 0.05$ ).

768

769 **Fig. 3.** Correlation between ACS2/6 activation and stomatal density and rate of  
770 stomatal clustering.

771 (A) Images of stomata distributed on strips of leaf abaxial epidermis under  
772 differential interference contrast (DIC) microscopy. Stomata and stomatal clusters  
773 are colored in green, and stomatal clusters are indicated by red arrows. The  
774 number of stomata is given in parentheses in each image. 6th rosette were  
775 collected under drought or normal watering conditions from 28-day-old seedlings  
776 of the WT control; mutants *acs2-1*, *acs6-1*, and *acs2-1acs6-1*, overexpression  
777 lines *ACS2-OE(#1)* and *ACS6-OE(#1)*, and complementation lines  
778 *ACS2/acs2-1(#1)* and *ACS6/acs6-1(#1)*. Experiments were performed three times  
779 with similar results. The black scale bar represents 100  $\mu\text{m}$ .

780 (B) and (C) Statistical analysis of stomatal density (B) and percentage of stomatal  
781 clusters (C). Stomata and stomatal clusters on 25 leaves of 25 seedlings were  
782 counted. Values are means  $\pm$  SD (Student's *t*-test; \*,  $P < 0.05$ ; \*\*,  $P < 0.01$ ).

783

784 **Fig. 4** Evidence for the function of SPCH as a transcription factor of *ACS2* and  
785 *ACS6* genes.

786 (A) Levels of *ACS2* and *ACS6* mRNA in immature leaves of WT control,  
787 loss-of-function *spch-1* and *spch-3* mutant, and *SPCH*-overexpressing  
788 *SPCH*-OE(#3) plants based on qRT-PCR. Experiments were repeated three times  
789 with similar results. Values are means  $\pm$  SD (Student's *t*-test; \*,  $P < 0.05$ ).

790 (B) Relative levels of *ACS2*, *ACS6*, and *SPCH* mRNA transcripts in leaves of  
791 21-day-old WT seedlings under normal watering conditions or after 6 days  
792 without watering. Experiments were repeated three times with consistent results.  
793 Values are means  $\pm$  SD (Student's *t*-test; \*,  $P < 0.05$ ).

794 (C) Diagram of the relative position of E-boxes (CACGTG or CGCGTG) and a  
795 reference DNA region in *ACS2* and *ACS6* gene promoters. Black rectangles  
796 indicate E-boxes in *ACS2* (*ACS2*-P1 and *ACS2*-P2) and *ACS6* (*ACS6*-P1)  
797 promoter regions, while white rectangles represent reference regions, namely  
798 randomly selected DNA fragments from *ACS2* (*ACS2*-P) and *ACS6* (*ACS6*-P)  
799 promoter regions.

800 (D) Relative abundance of SPCH-immunoprecipitated DNA fragments as  
801 determined by qRT-PCR. All experiments, which included three biological  
802 replicates, gave similar results. Values are means  $\pm$  SD (Student's *t*-test; \*\*,  $P <$   
803 0.01).

804 (E) and (F) Binding of SPCH protein to *ACS2* and *ACS6* genes in tobacco leaves  
805 in a transient transcription dual-luciferase assay. The size and intensity of LUC  
806 fluorescence signals recorded by IndiGO software are proportional to binding  
807 ability (E). Relative binding ability was evaluated quantitatively by calculating the  
808 ratio of the fluorescence intensity of firefly luciferase (LUC) to that of an internal  
809 control, Renilla luciferase (REN) (F). Values are means  $\pm$  SD ( $n = 3$ ). Asterisks  
810 indicate significant differences (\*,  $P < 0.05$ ) compared with leaf regions injected  
811 with *Agrobacterium* harboring an empty vector.

812

813 **Fig. 5.** Correlation between SPCH activity and ACS2/6-dependent ACC  
814 accumulation and stomatal density and pattern.  
815 (A) and (B) qRT-PCR-based relative levels of *SPCH* mRNA transcripts and ACC  
816 content in immature leaves of WT control, loss-of-function mutant *spch-1* and  
817 *spch-3*, and *SPCH*-overexpressing *SPCH*-OE(#1), *SPCH*-OE(#2), and  
818 *SPCH*-OE(#3) plants. The *ACTIN8* gene was used as an internal control. The  
819 experiment was repeated three times with consistent results. Values are means  $\pm$   
820 SD (Student's *t*-test; \*,  $P < 0.05$ ; \*\*,  $P < 0.01$ ).  
821 (C) and (D) DIC images and statistical summary of stomatal density and  
822 patterning on the abaxial epidermis of *spch-1*, *acs2-lacs6-1*, and  
823 *spch-lacs2-lacs6-1* plants. Numbers of stomata are indicated in parentheses in  
824 each image. Stomata are false colored in green. The black scale bar represents 100  
825  $\mu\text{m}$  (C). Stomata on 25 leaves of 25 seedlings were counted (D). Values are means  
826  $\pm$  SD. Significant differences are indicated by asterisks (Student's *t*-test; \*,  $P <$   
827 0.05; \*\*,  $P < 0.01$ ).  
828

829 **Fig. 6.** Inhibitory effects of ACS2/6 activation and ACC treatment on SDD1  
830 expression and protein accumulation.

831 (A) qRT-PCR-based relative levels of *SDD1* mRNA transcripts in immature leaves  
832 of WT, *acs2-1*, *acs6-1*, *acs2-lacs6-1*, ACS2-OE(#1), and ACS6-OE(#1) seedlings.  
833 The experiment was repeated three times with consistent results. Values are  
834 means  $\pm$  SD (Student's *t*-test; \*,  $P < 0.05$ ; \*\*,  $P < 0.01$ ).

835 (B) Evaluation of SDD1 protein levels by western blotting. The fusion protein  
836 GFP-SDD1 was collected from immature leaves of  
837 *pSDD1::SDD1-GFP*-expressing WT or *acs2-lacs6-1* lines with or without  
838 drought and ACC (0 or 10  $\mu$ M) treatment. Levels of GFP-SDD1 fusion protein  
839 were determined using GFP antibody. GAPDH protein was used as a loading  
840 control. The experiment was repeated three times with consistent results.

841

842 **Fig. 7.** SPCH promotion of *GTL1* expression.

843 (A) qRT-PCR-based relative levels of *GTL1* mRNA transcripts in immature leaves  
844 of WT, *spch-1*, *spch-3*, and *SPCH-OE*(#3) plants. *ACTIN8* was used as an internal  
845 control. The experiment was repeated three times with consistent results. Values  
846 are means  $\pm$  SD (Student's *t*-test; \*,  $P < 0.05$ ).

847 (B) and (C) Binding of SPCH protein to the *GTL1* promoter in tobacco leaves in a  
848 transient transcription dual-luciferase assay. The size and intensity of LUC  
849 fluorescence signals recorded by IndiGO software are proportional to binding  
850 ability (B). Relative binding ability was evaluated quantitatively by calculating  
851 the ratio of the fluorescence intensity of firefly luciferase (LUC) to that of an  
852 internal control, Renilla luciferase (REN) (C). Values are means  $\pm$  SD ( $n = 3$ ).  
853 Asterisks indicate significant differences (\*,  $P < 0.05$ ) compared with leaf regions  
854 injected with *Agrobacterium* harboring an empty vector.  
855



856 **Fig. 8.** ACS2/6-generated ACC buffering of Ca<sup>2+</sup> activity in stomatal lineage cells.  
857 (A) The relative fluorescence intensity of YC3.6 expression in stomatal lineage  
858 cells of immature leaves of NES-YC3.6-expressing WT or *acs2-1acs6-1* plants or  
859 by drought treatment. Representative images from at least 25 leaves in each line  
860 are shown. Pseudocolors in images correspond to relative Ca<sup>2+</sup> levels according to  
861 the color scale on the right. Scale bar, 10 μm.  
862 (B) Evaluation of Ca<sup>2+</sup> levels in stomatal lineage cells (labeled with red circle) of  
863 immature by calculating the ratio of the FRET acceptor cpVenus (at 525-555 nm)  
864 to the FRET donor CFP (at 465-499 nm). The experiment was repeated three  
865 times with consistent results. Values are means ± SD (Student's *t*-test; \*\*, *P* <  
866 0.01).  
867

868 **Fig. 9.** Diagram illustrating the role of ACS2/6 expression and ACC accumulation  
869 in the integration of SPCH-initiated stomatal development with SDD1-dependent  
870 stomatal spacing.

871 In the top row depicting stomatal development, non-stomatal lineage cells, such as  
872 leaf epidermal cells, protodermal cells, and meristemoid mother cells (MMCs),  
873 are shown in blue, while stomatal lineage cells, including meristemoid cells, guard  
874 mother cells (GMCs), and guard cell (GCs), are indicated in yellow. Under water  
875 deficit conditions, SPCH increases ACS2, ACS6, and GTL1 expressions. Next,  
876 ACS2/6-generated ACC accumulation may be involved in two processes: 1)  
877 promoting the transformation of GMCs into GCs, and 2) inducing a shortage of  
878  $\text{Ca}^{2+}$  in stomatal lineage cells and increasing SDD1 activity. As a consequence of  
879 these two processes, ACS2/6-generated ACC accumulation increases stomatal  
880 density and the rate of clustering, which ultimately leads to plant wilting and  
881 death under conditions of escalating drought. Relationships among these events  
882 are indicated by arrows: blue for conclusions drawn from the literature, and black  
883 for findings of the present study.

884

# Figures

Figure 1

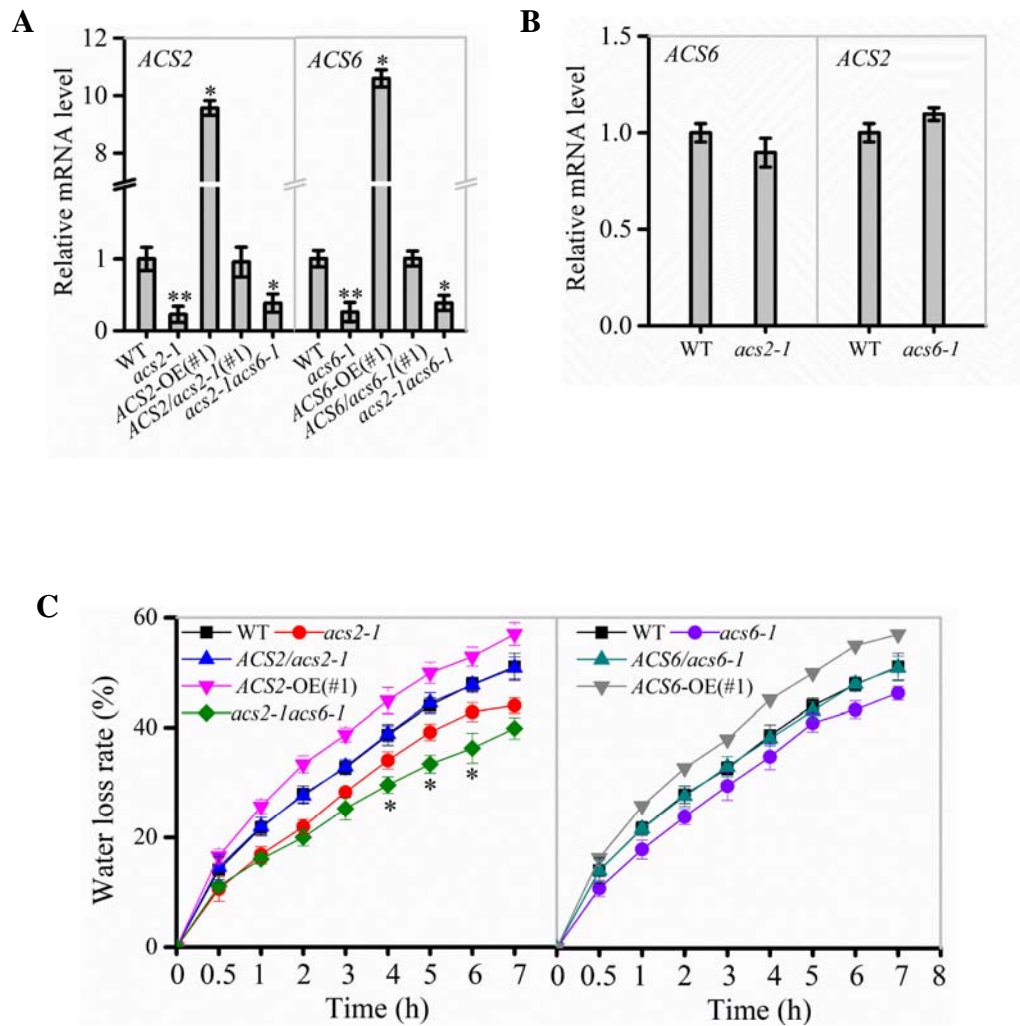

Figure 2

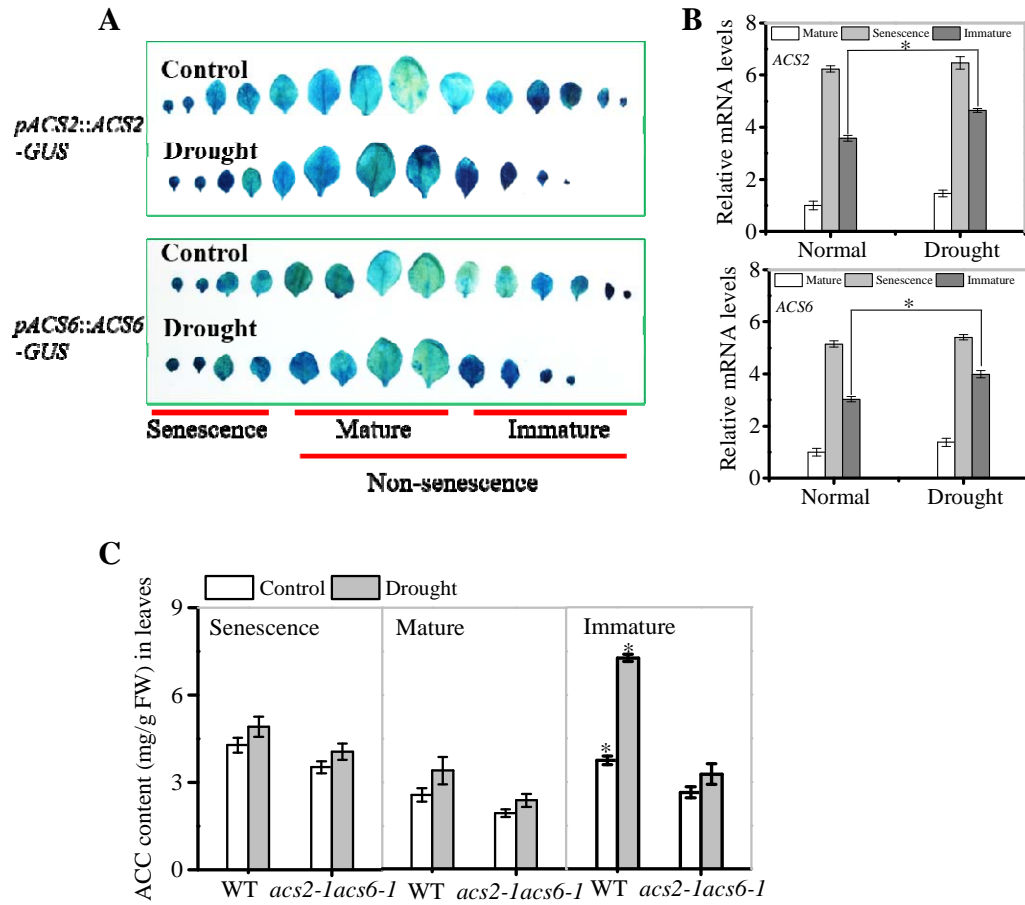

Figure 3

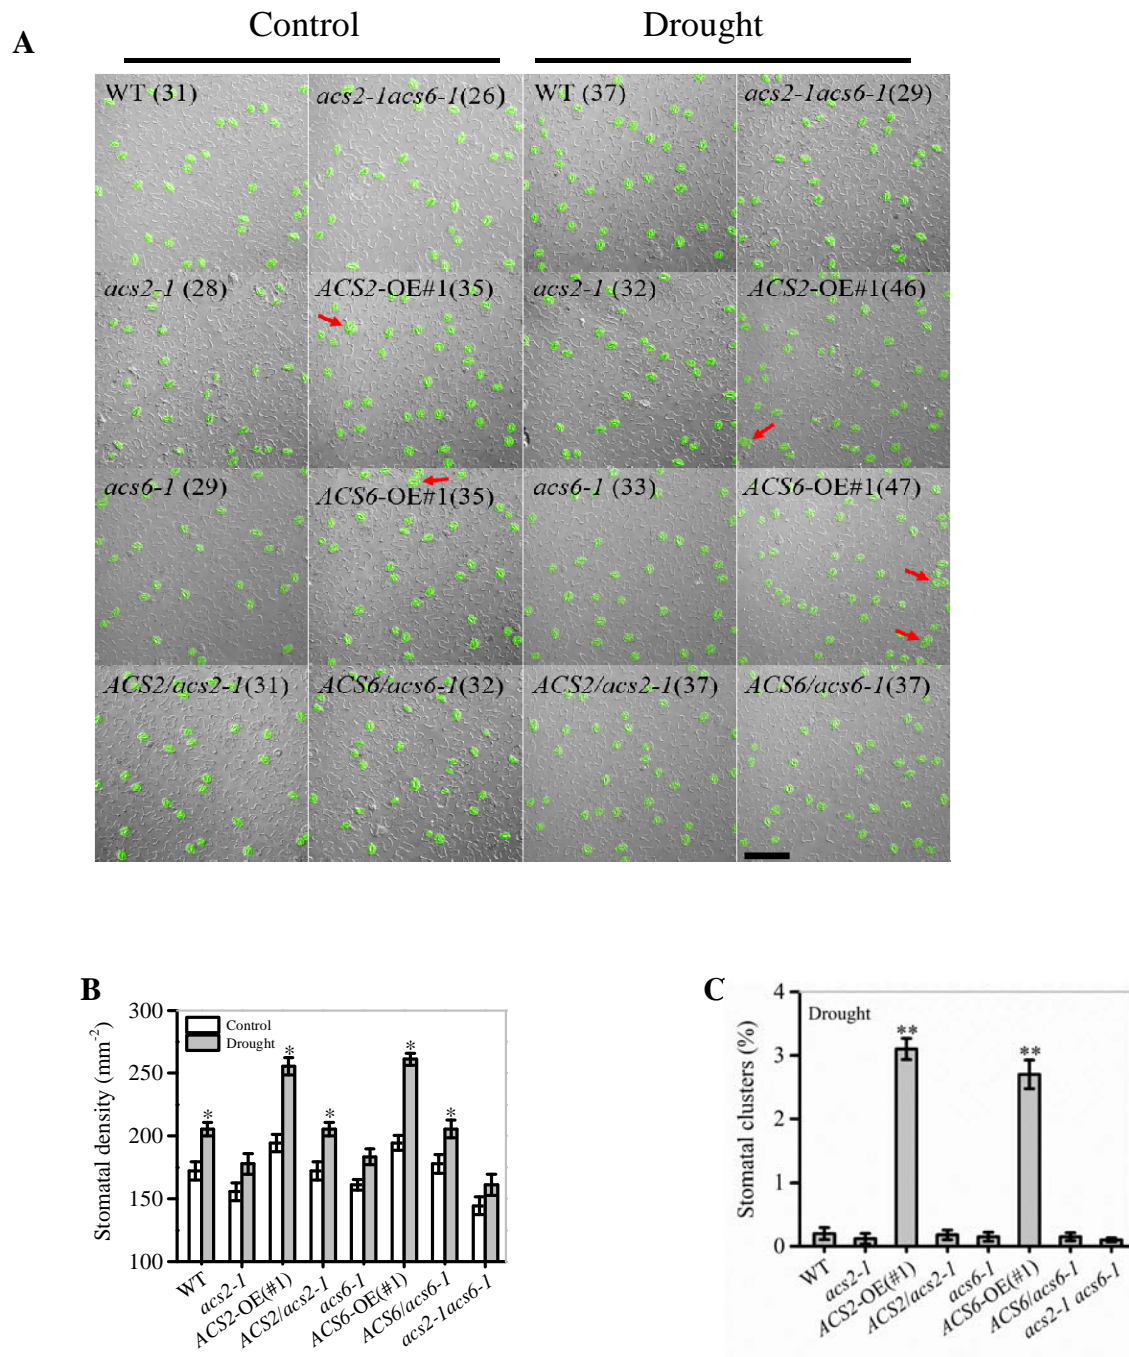

Figure 4

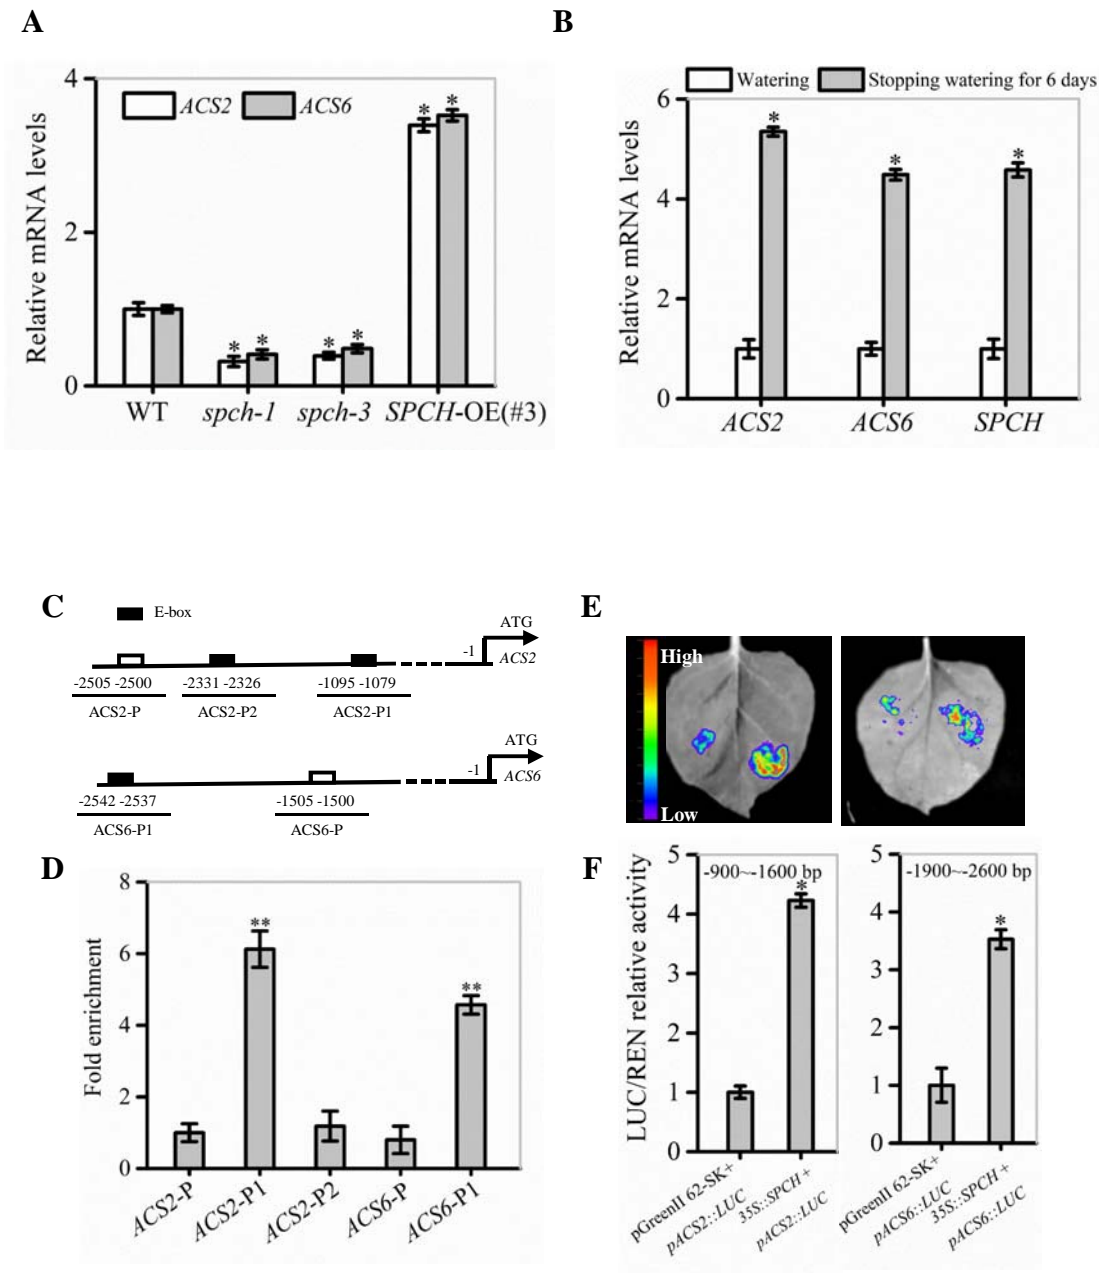

Figure 5

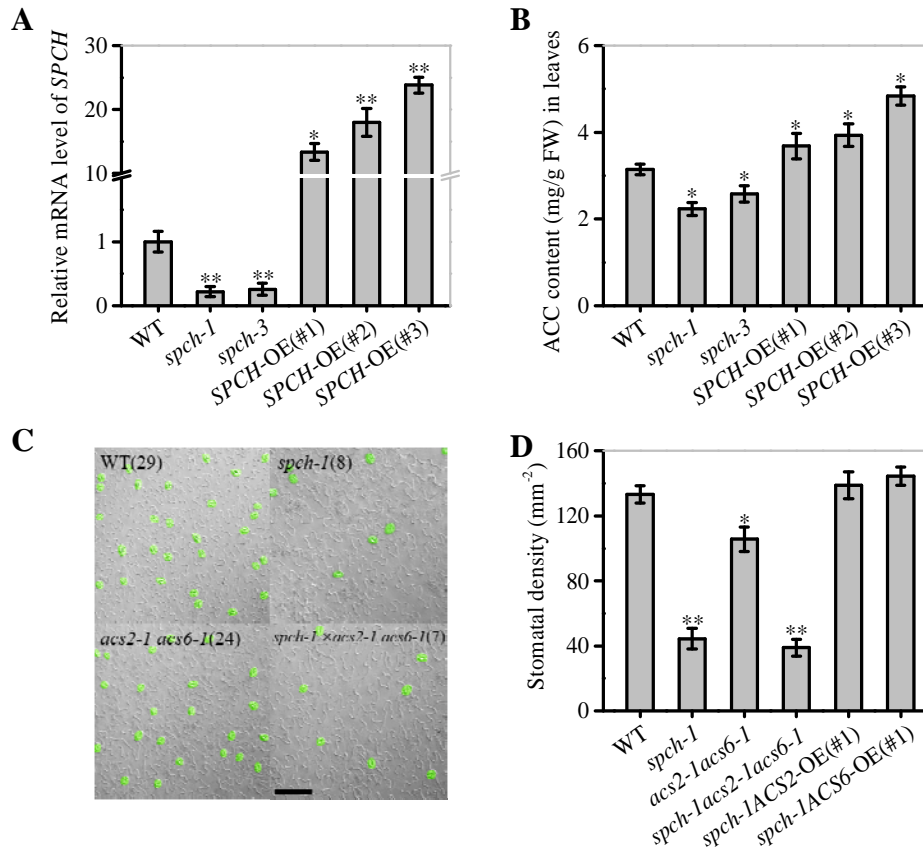

Figure 6

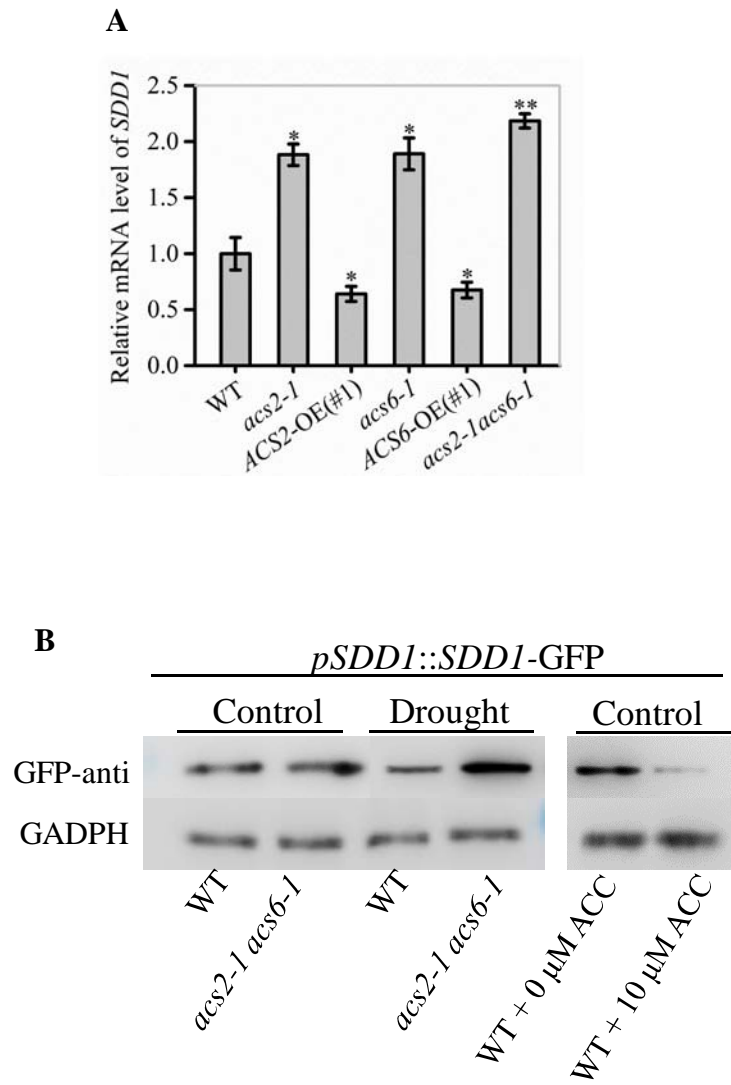



Figure 7

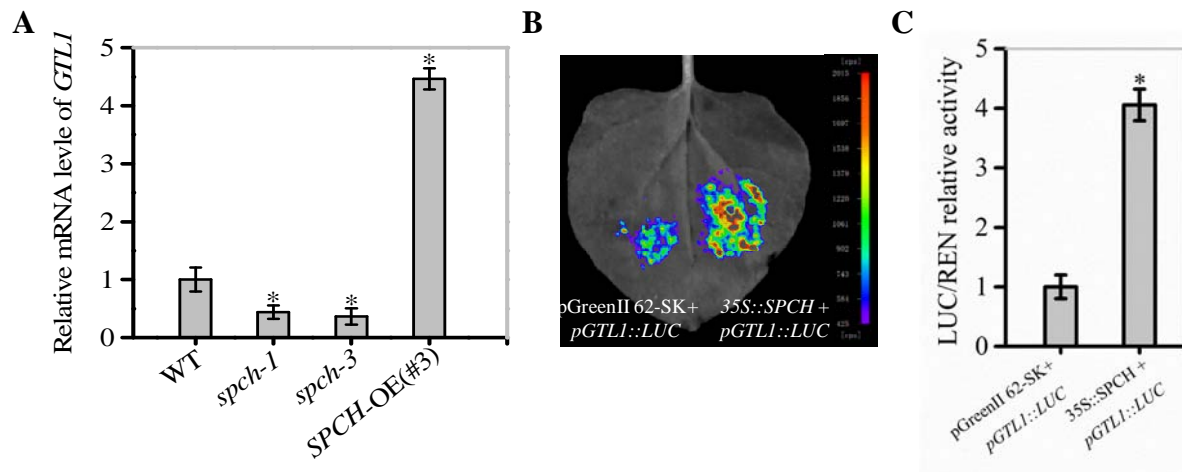

Figure 8

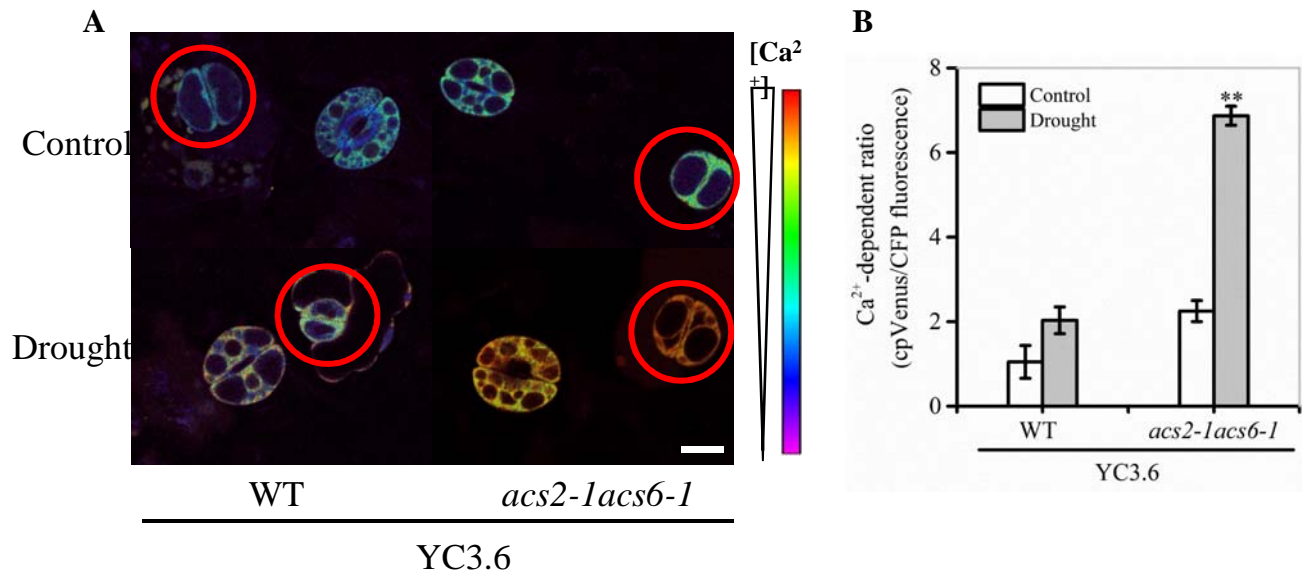

Figure 9

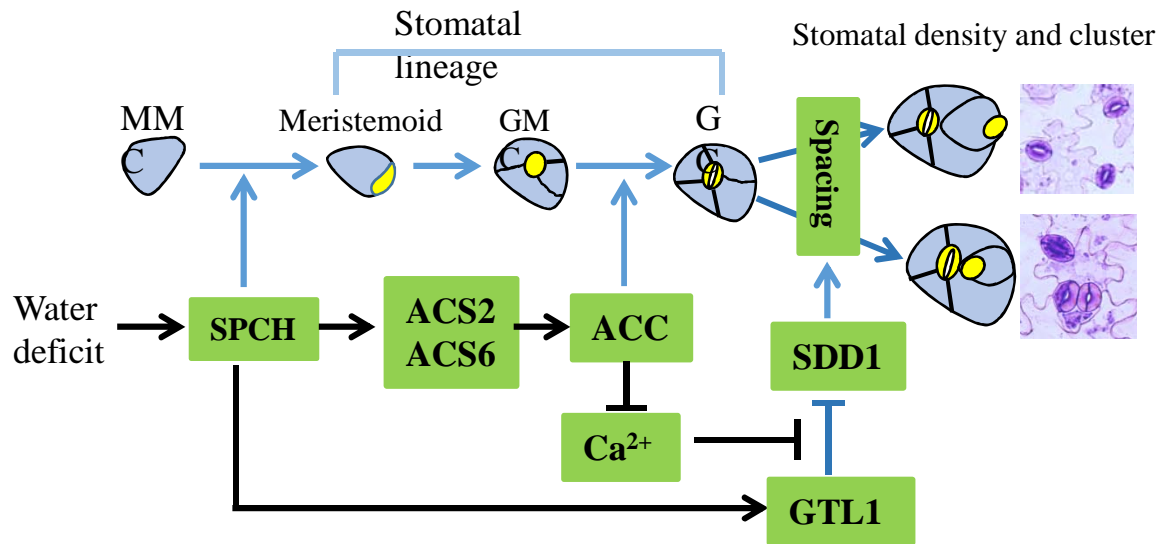

Source: http://biorxiv.org/content/10.1101/2021.04.27.441570v1.full.pdf
